# Supplementary material for: Mitochondrial Genomes of Mammals from the Brazilian Cerrado and Phylogenetic Considerations for the Orders Artiodactyla, Carnivora, and Chiroptera (Chordata: Mammalia)
Source: Preprints.org preprint supplement (doi:10.20944/preprints202410.0316.v1), 2024-10-04
Supplement: Supplementary file 1 [file supplementary]

*Lycloplex vetulus*

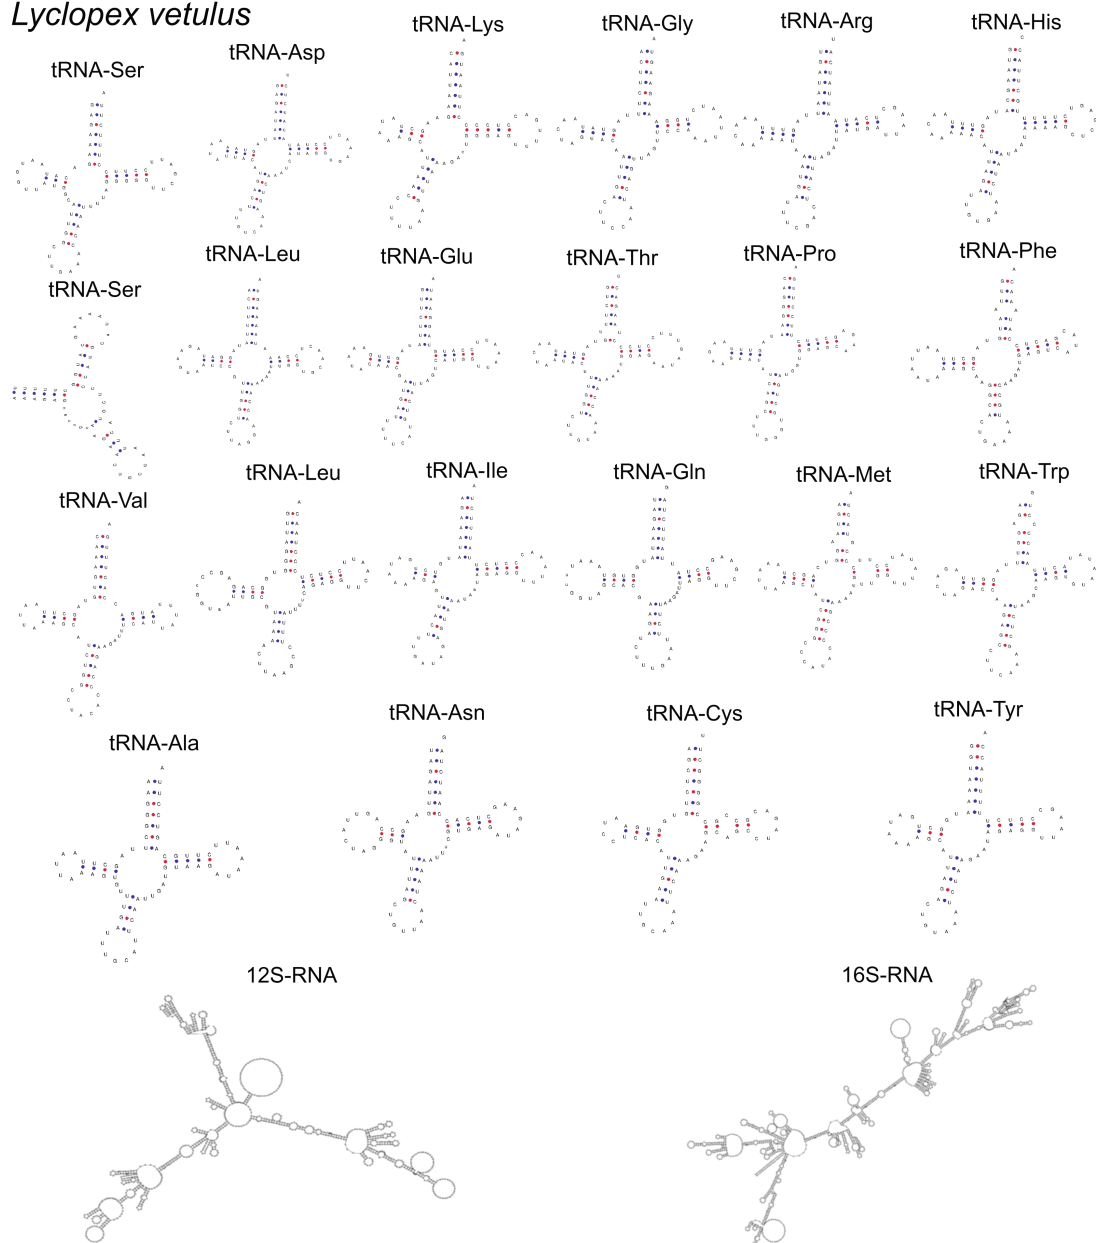

Figure - 7: Secondary structure of tRNAs, 16S rRNA and 12S rRNA of *Lycloplex vetulus*.

*Cerdocyon thous*

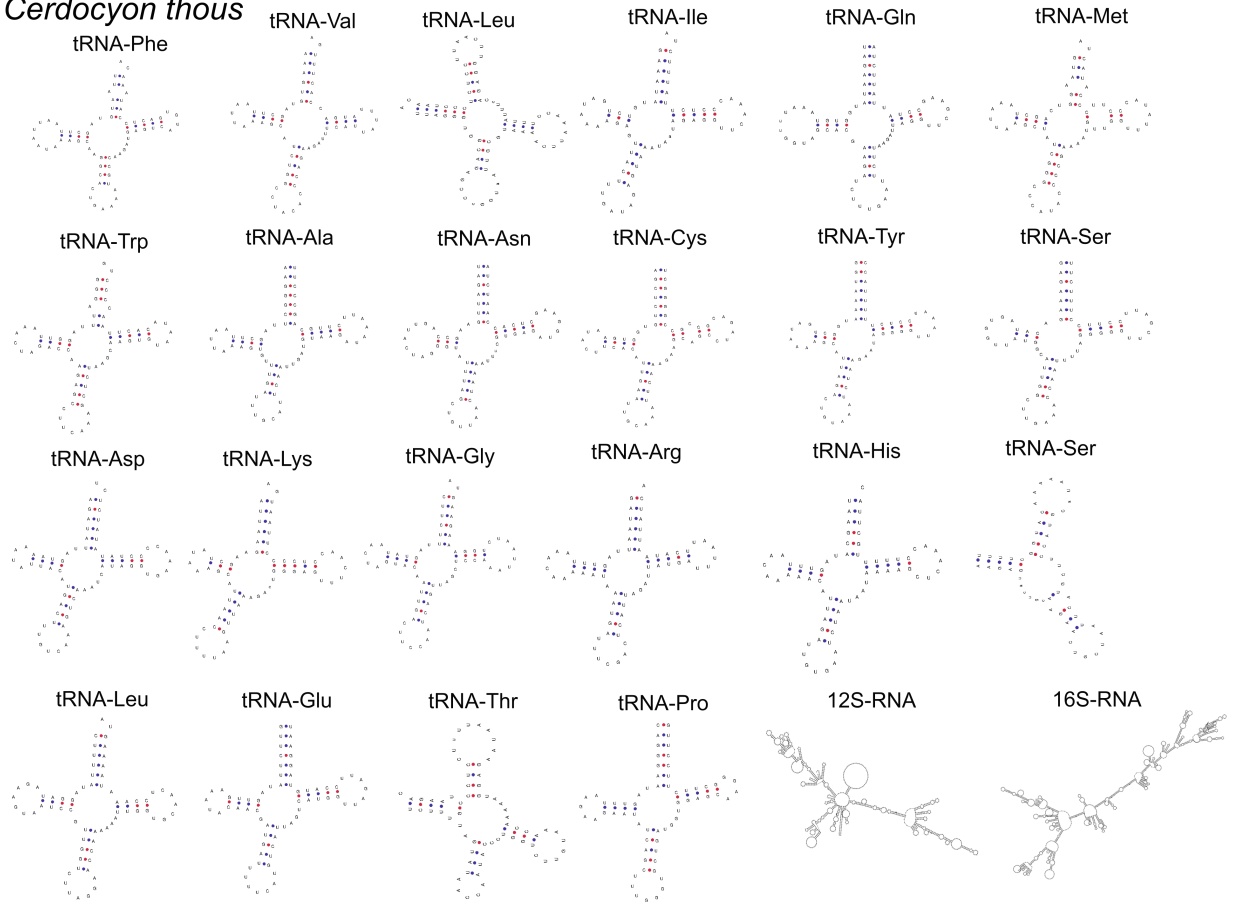

Figura - 8: Secondary structure of tRNAs, 16S rRNA and 12S rRNA of *Cerdocyon thous*.

*Tayassu pecari*

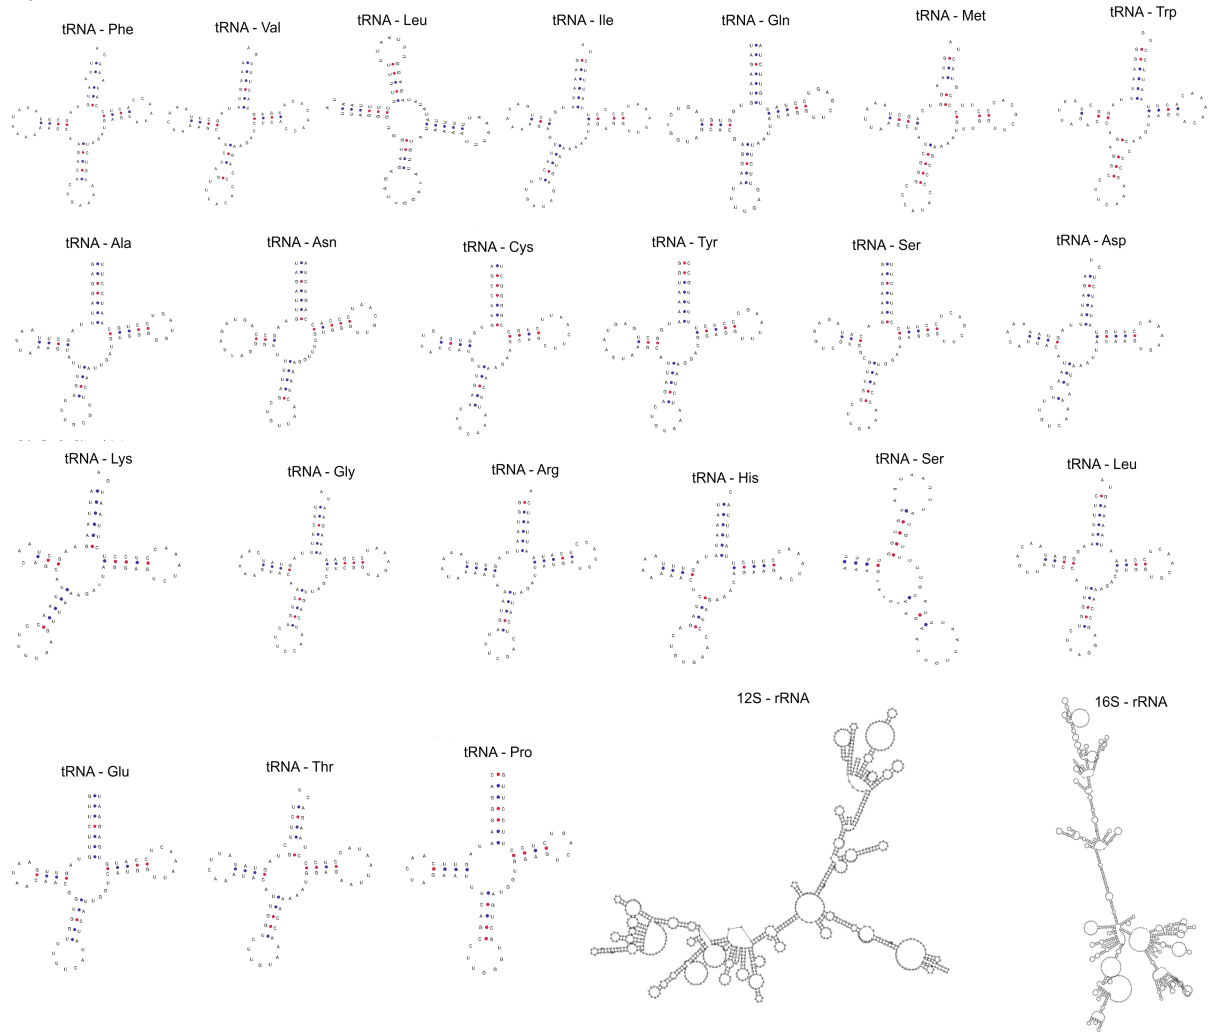

Figure - 9: Secondary structure of tRNAs, 16S rRNA and 12S rRNA of *Tayassu pecari*.

*Tadarida brasilienses*

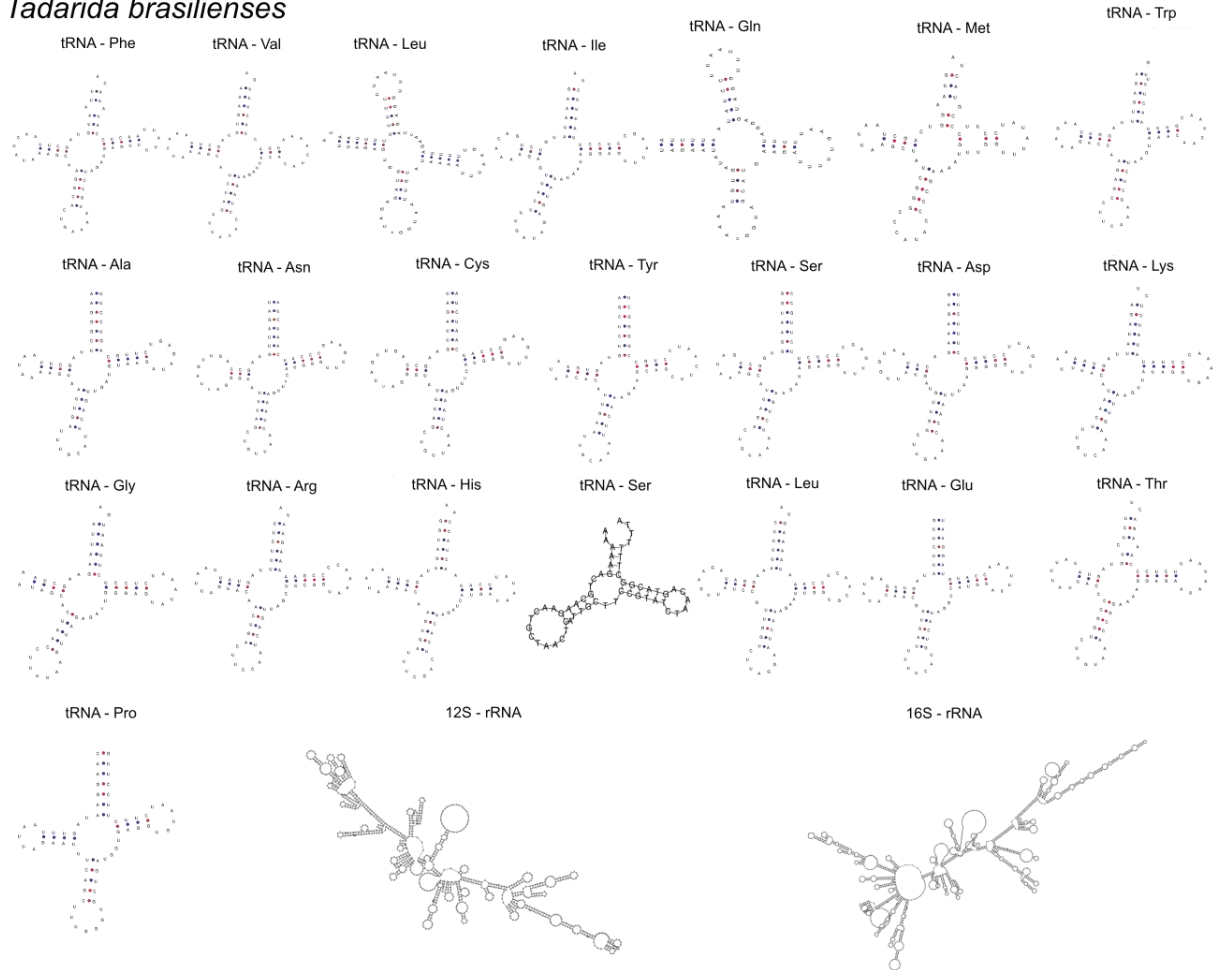

Figure - 10: Secondary structure of tRNAs, 16S rRNA and 12S rRNA of *Tadarida brasilienses*.
